# Supplementary material for: Solvent-mediated length tuning of ultrathin platinum–cobalt nanowires for efficient electrocatalysis
Source: Royal Society of Chemistry journal article supplement (doi:10.1039/c8ta08251k), 2018-01-01
Supplement: c8ta08251k1.pdf [file c8ta08251k1.pdf]

## Supporting Information

### Solvent-Mediated Length Tuning of Ultrathin Platinum-Cobalt Nanowires for Efficient Electrocatalysis

Hui Xu,<sup>a1</sup> Jingjing Wei,<sup>a1</sup> Min Zhang,<sup>a</sup> Caiqin Wang,<sup>b\*</sup> Yukihide Shiraishi,<sup>c</sup> Jun Guo,<sup>d</sup> and Yukou Du<sup>a\*</sup>

<sup>a</sup> *College of Chemistry, Chemical Engineering and Materials Science, Soochow University, Suzhou 215123, PR China*

<sup>b</sup> *College of Science, Nanjing Forestry University, Nanjing, 210000 PR China*

<sup>c</sup> *Tokyo University of Science Yamaguchi, Sanyo-Onoda-shi, Yamaguchi 756-0884, Japan.*

<sup>d</sup> *Testing & Analysis Center, Soochow University, Jiangsu 215123, China*

\* *Corresponding author: Tel: 86-512-65880089, Fax: 86-512-65880089;*

*E-mail: duyk@suda.edu.cn (Y. Du)*

*Hui Xu and Jingjing Wei contributed equally to this work*

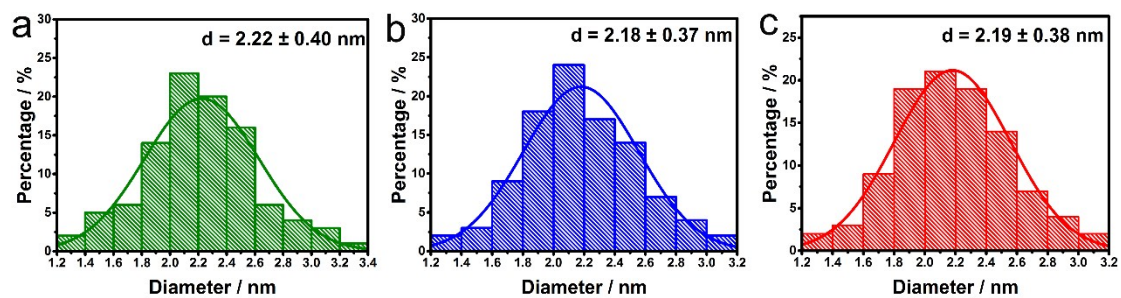

**Figure S1.** Diameter distributions of (a)  $\text{Pt}_3\text{Co}_1$  UNWs-S, (b)  $\text{Pt}_3\text{Co}_1$  UNWs-M, and (c)  $\text{Pt}_3\text{Co}_1$  UNWs-L.

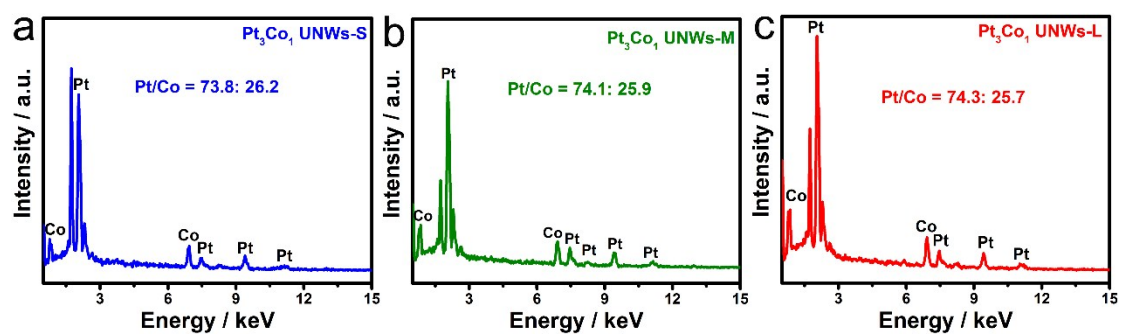

**Figure S2.** EDX patterns of (a)  $\text{Pt}_3\text{Co}_1$  UNWs-S, (b)  $\text{Pt}_3\text{Co}_1$  UNWs-M, and (c)  $\text{Pt}_3\text{Co}_1$  UNWs-L.

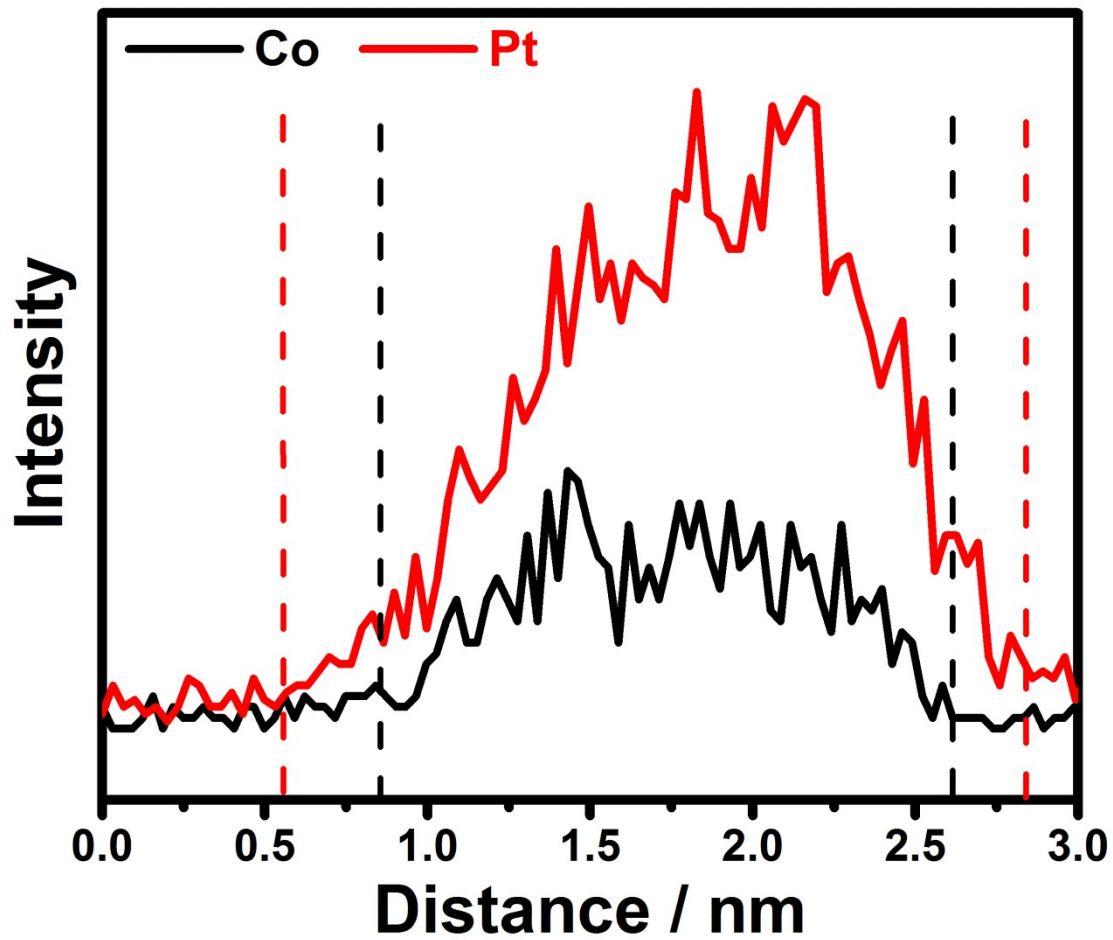

Figure S3. EDS line-scanning profile of Pt<sub>3</sub>Co<sub>1</sub> UNWs-L.

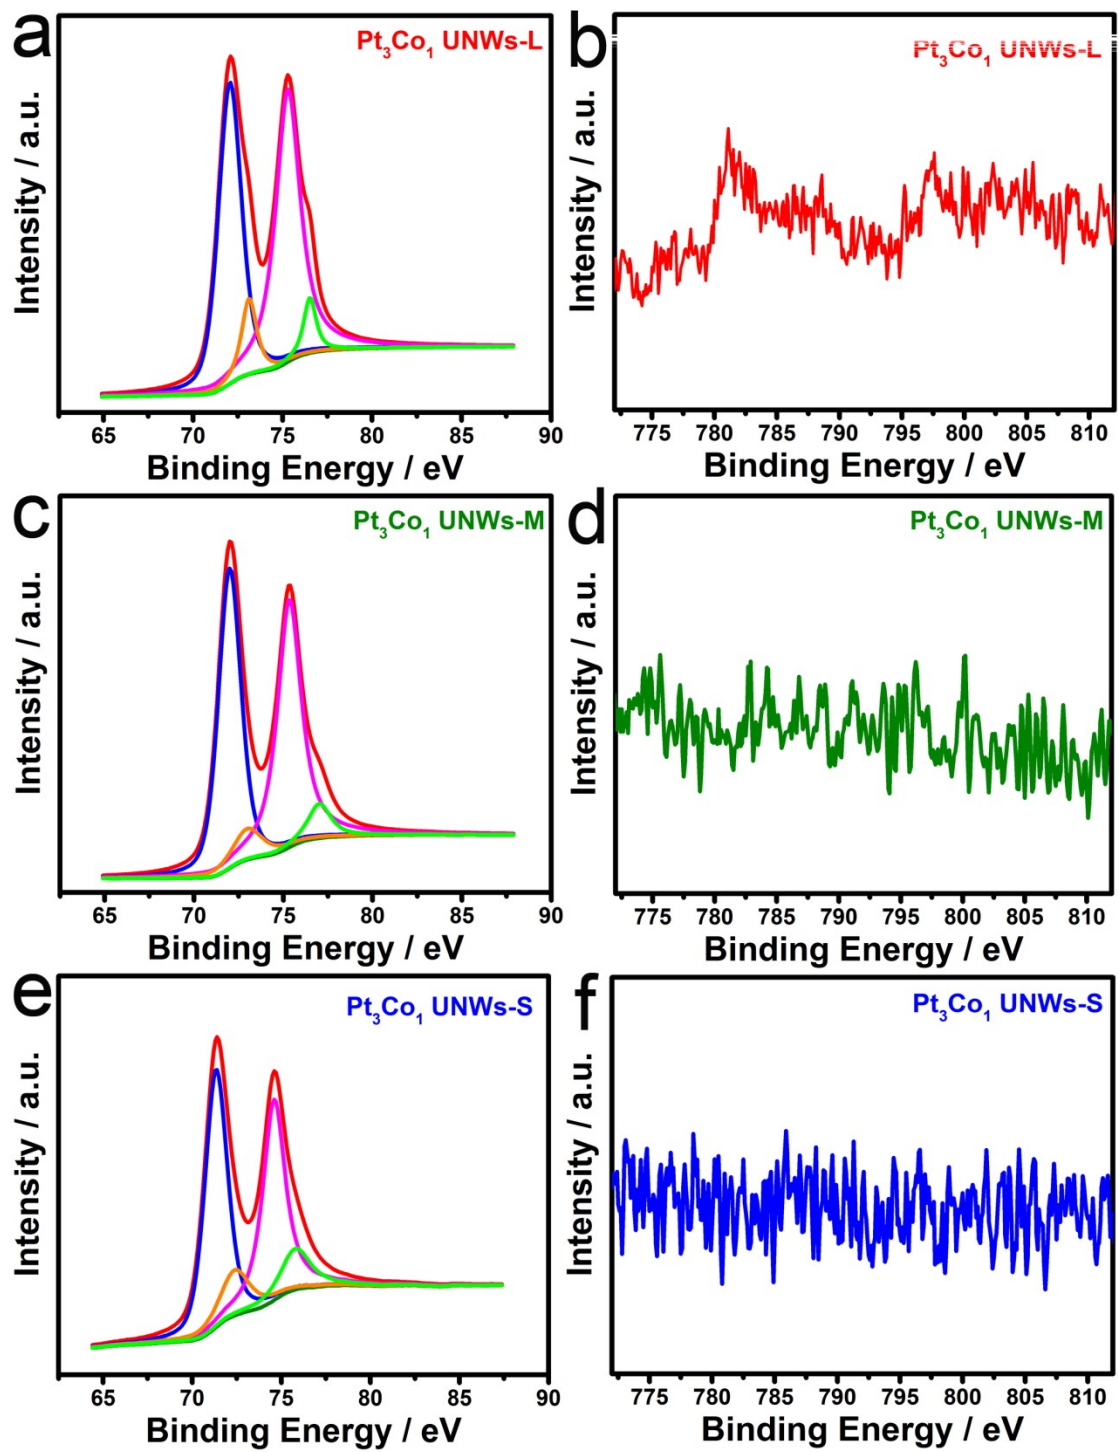

**Figure S4.** High-resolution XPS spectra of Pt 4f and Co 2p of (a and b) Pt<sub>3</sub>Co<sub>1</sub> NWs-L, (c and d) Pt<sub>3</sub>Co<sub>1</sub> NWs-M, and (e and f) Pt<sub>3</sub>Co<sub>1</sub> NWs-S.

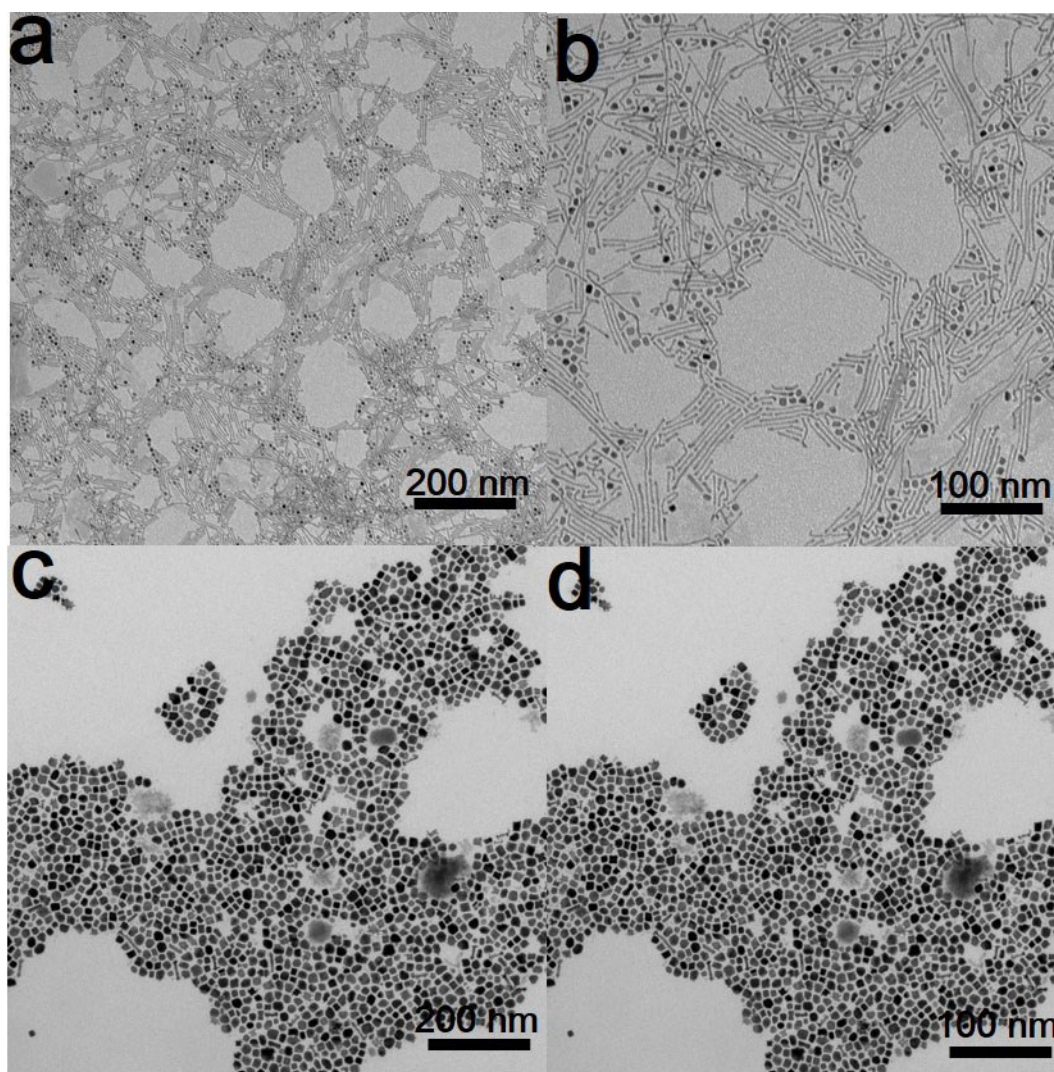

**Figure S5.** Representative TEM images of Pt<sub>3</sub>Co<sub>1</sub> UNWs prepared in the same conditions as Pt<sub>3</sub>Co<sub>1</sub> UNWs-L while replacing the (a and b) Mo(CO)<sub>6</sub> with W(CO)<sub>6</sub> or replacing glucose with (c and d) citric acid.



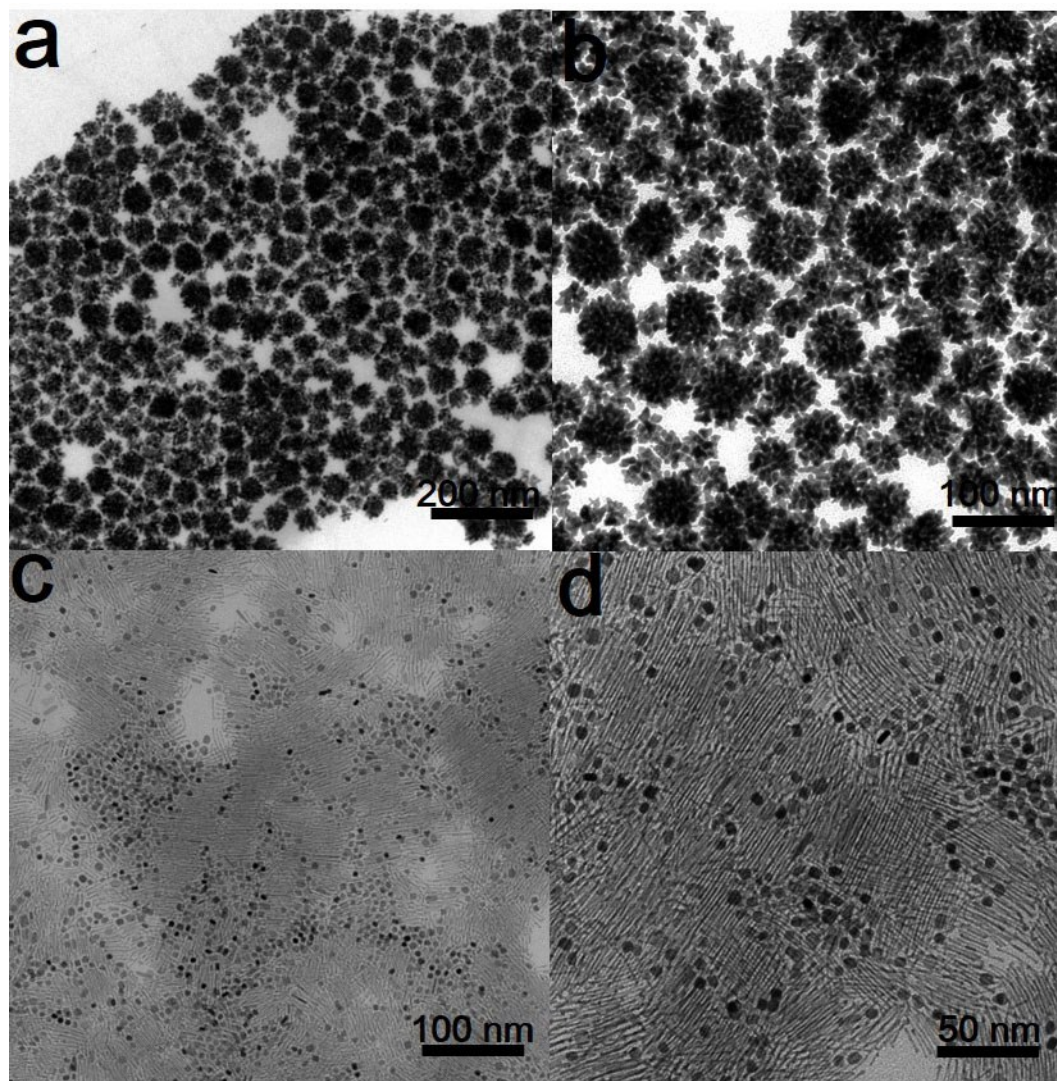

**Figure S6.** Representative TEM images of  $\text{Pt}_3\text{Co}_1$  UNWs prepared in the same conditions as  $\text{Pt}_3\text{Co}_1$  UNWs-L in the absence of  $\text{Mo}(\text{CO})_6$  with  $\text{W}(\text{CO})_6$  or replacing CTAC with (c and d) CTAB.

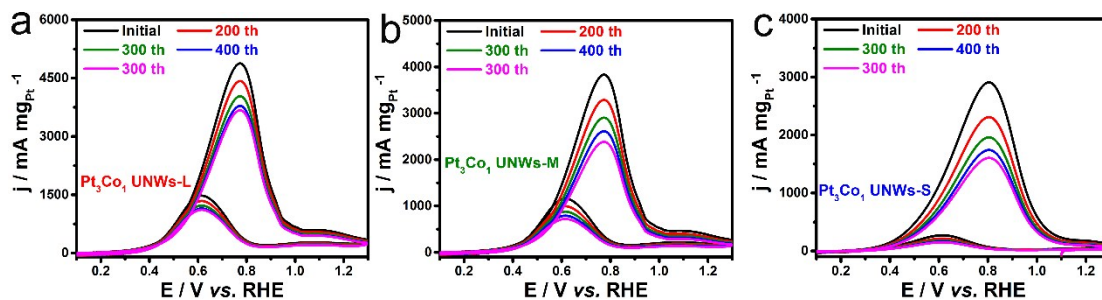

**Figure S7.** CV curves of  $\text{Pt}_3\text{Co}_1$  UNWs-S,  $\text{Pt}_3\text{Co}_1$  UNWs-M, and  $\text{Pt}_3\text{Co}_1$  UNWs-L at different scan rates in 1.0 M KOH and 1.0 M EG solution.

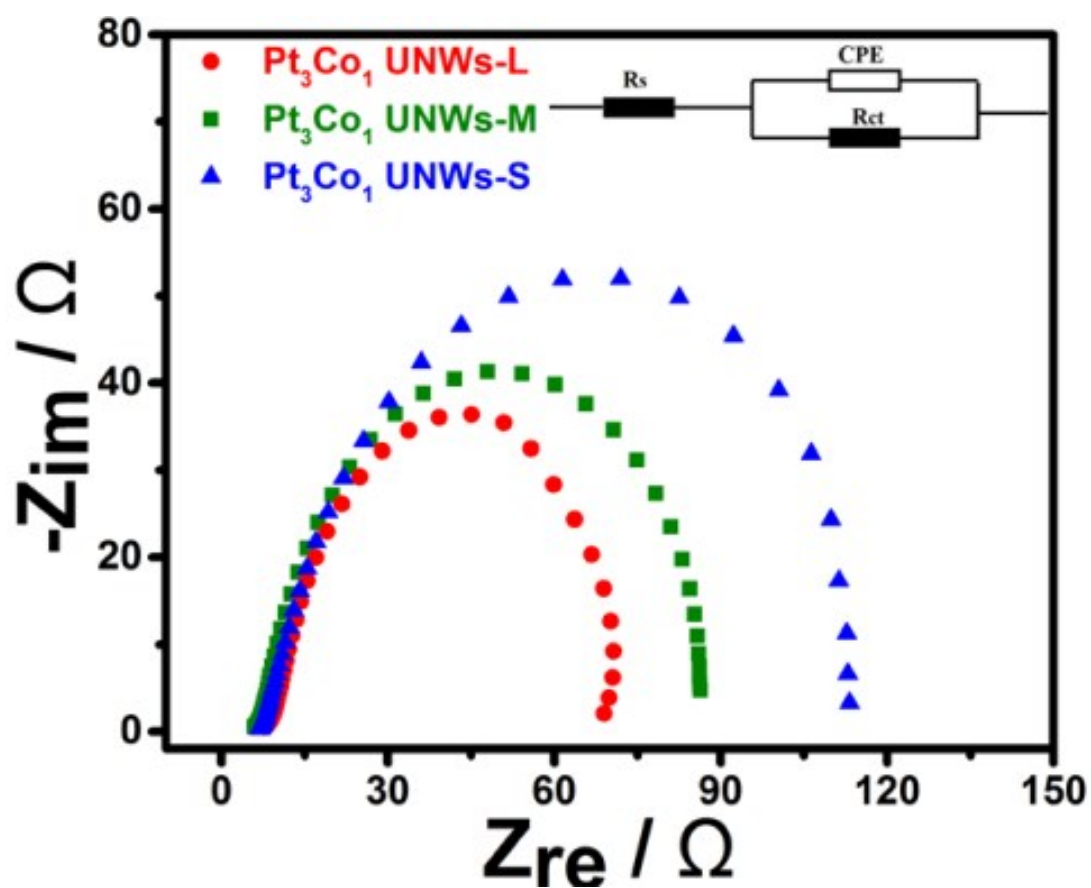

**Figure S8.** Nyquist plots of  $\text{Pt}_3\text{Co}_1$  UNWs-S,  $\text{Pt}_3\text{Co}_1$  UNWs-M, and  $\text{Pt}_3\text{Co}_1$  UNWs-L in 1.0 M KOH and 1.0 M glycerol solution at 0.8 V.

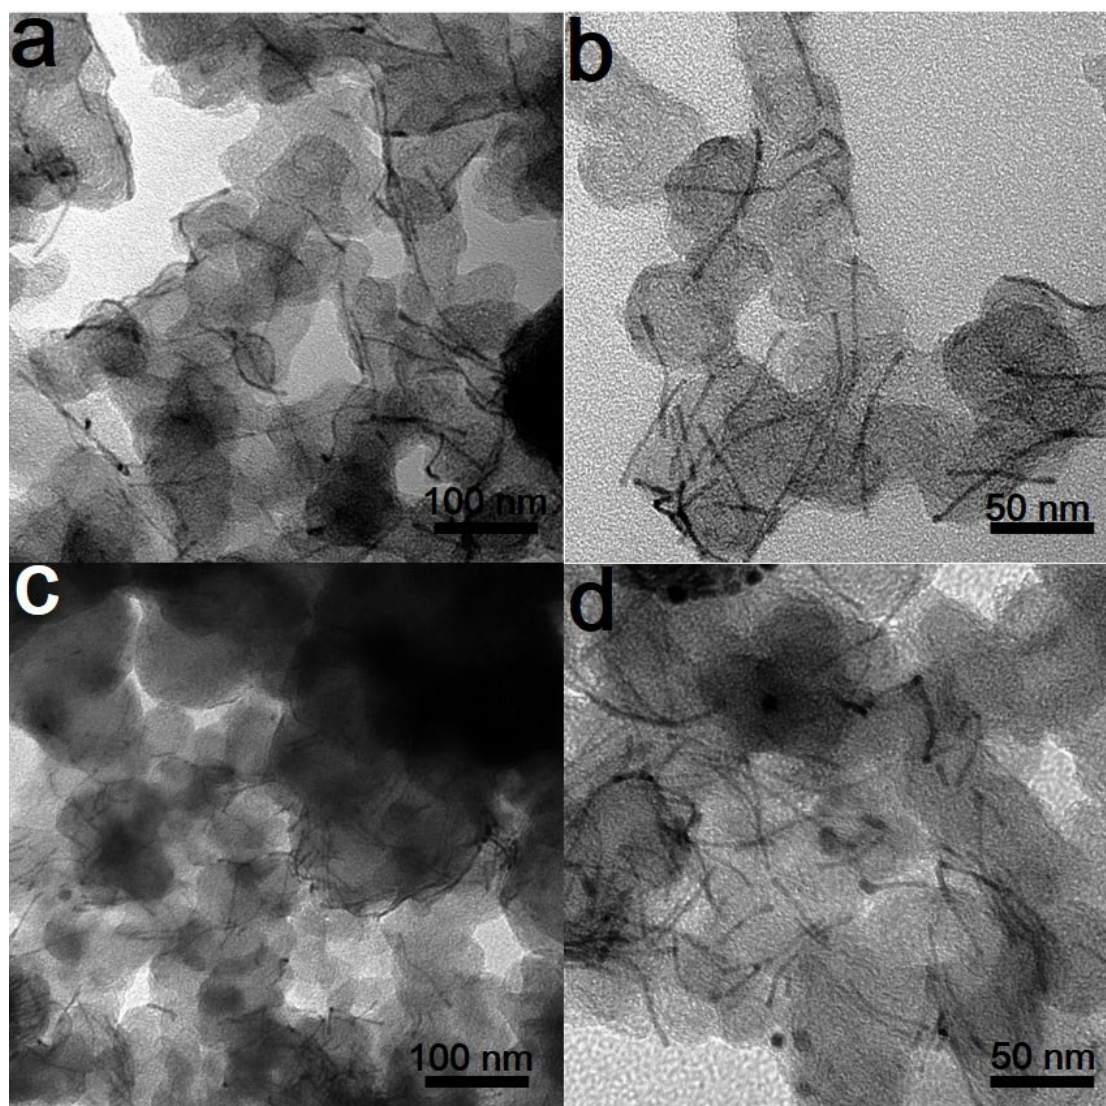

**Figure S9.** Representative TEM images of Pt<sub>3</sub>Co<sub>1</sub> UNWs-L (a and b) before and (c and d) after long-term electrochemical measurements.



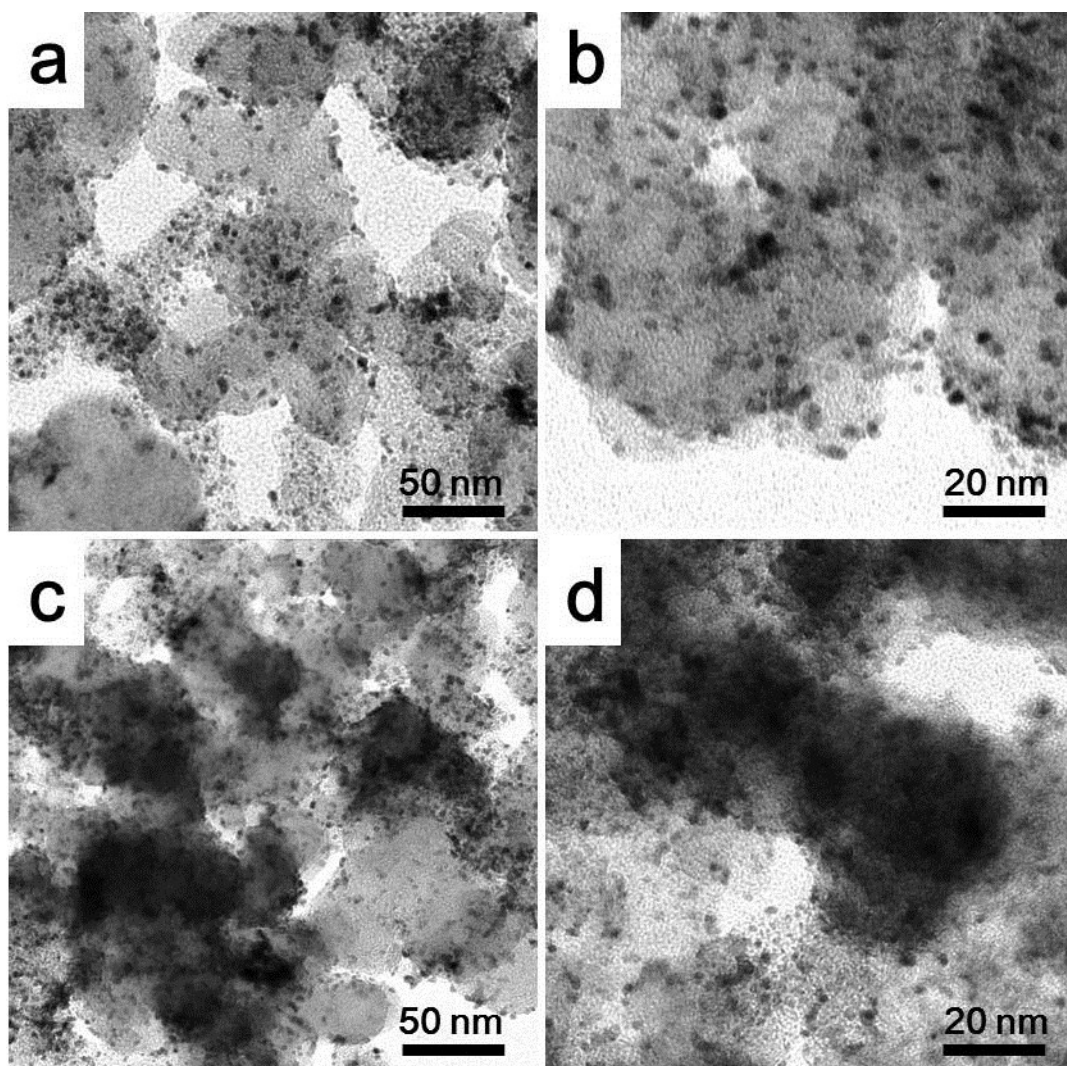

**Figure S10.** Representative TEM images of commercial Pt/C catalysts (a and b) before and (c and d) after long-term electrochemical measurements.

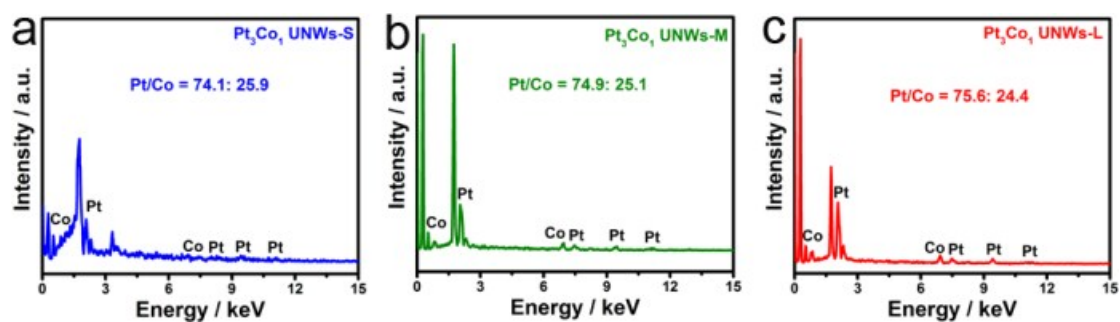

**Figure S11.** EDX patterns of (a)  $\text{Pt}_3\text{Co}_1$  UNWs-S, (b)  $\text{Pt}_3\text{Co}_1$  UNWs-M, and (c)  $\text{Pt}_3\text{Co}_1$  UNWs-L after catalytic cycles.

**Table S1** EGOR performances of Pt<sub>3</sub>Co<sub>1</sub> UNWs-L and various electrocatalysts from published works.

| Catalysts                                     | Peaks currents from CV curves |                                         | Electrolyte                                     | References                                             |
|-----------------------------------------------|-------------------------------|-----------------------------------------|-------------------------------------------------|--------------------------------------------------------|
|                                               | J <sub>m</sub><br>(A/mg)      | J <sub>s</sub><br>(mA/cm <sup>2</sup> ) |                                                 |                                                        |
| Pt <sub>3</sub> Co <sub>1</sub> UNWs-L        | 4.9                           | 9.4                                     | 1.0 M KOH + 1.0 M EG                            | This work                                              |
| Pt/Ru/XC72 Catalyst                           | 0.24                          |                                         | 0.5 M H <sub>2</sub> SO <sub>4</sub> + 0.4M EG  | J. Power Sources <b>2011</b> , <i>196</i> , 1078-1083. |
| PtPd@Pt Nanocrystals/rGO                      | 0.23                          |                                         | 0.5 M H <sub>2</sub> SO <sub>4</sub> + 0.5 M EG | Electrochim. Acta <b>2016</b> , <i>18</i> , 576-583.   |
| PtNi <sub>0.67</sub> Pb <sub>0.26</sub> NWs/C | 0.42                          | 0.65                                    | 0.1 M HClO <sub>4</sub> + 0.2 M EG              | J. Mater. Chem. A <b>2017</b> , <i>5</i> , 18977-18983 |
| Pd <sub>1</sub> Cu <sub>1</sub> nanosphere    | 3.58                          |                                         | 1.0 M KOH + 1.0 M EG                            | Electrochim. Acta <b>2018</b> , <i>261</i> , 521-529.  |
| PdCuBi nanoparticles                          | 0.171                         |                                         | 1 M KOH + 0.5 M EG                              | J. Power Sources. <b>2014</b> , <i>249</i> , 9-12      |
| PtCu nanocrystals                             | 4.259                         |                                         | 1.0 M                                           | Int. J. Hydrogen                                       |

|                         |       |  |                         |                                                                     |
|-------------------------|-------|--|-------------------------|---------------------------------------------------------------------|
|                         |       |  | KOH + 1.0 M EG          | Energy <b>2018</b> , <i>43</i> ,<br>1489-1496                       |
| PtRu alloy              | 3.052 |  | 1.0 M<br>KOH + 1.0 M EG | Int. J. Hydrogen<br>Energy <b>2017</b> , <i>42</i> ,<br>20720-20728 |
| PdAg nanoparticle       | 0.169 |  | 0.1 M<br>KOH + 1.0 M EG | Int. J. Hydrogen<br>Energy <b>2015</b> , <i>40</i> ,<br>2225-2230   |
| PtPd@Pt<br>nanocrystals | 1.167 |  | 0.5 M<br>KOH + 0.5 M EG | Electrochim. Acta<br><b>2016</b> , <i>187</i> , 576-583.            |

**Table S2** A literature survey of the activity and stability of catalysts toward alcohol electrooxidation

| Catalysts                                             | Electrolyte                                              | Cycling stability                    | References                                                       |
|-------------------------------------------------------|----------------------------------------------------------|--------------------------------------|------------------------------------------------------------------|
| Pt <sub>3</sub> Co <sub>1</sub> UNWs-L                | 1.0 M KOH +<br>1.0 M EG                                  | 75.3 % activity<br>after 500 cycles  | This work                                                        |
| Pt <sub>3</sub> Co <sub>1</sub> UNWs-L                | 1.0 M KOH +<br>1.0 M Glycerol                            | 74.9 % activity<br>after 500 cycles  | This work                                                        |
| Pd/C promoted<br>with CaSiO <sub>3</sub>              | 1.0 M KOH +<br>1.0 M EG                                  | 60 % activity after<br>1000 cycles   | Electrochim. Acta <b>2015</b> ,<br><i>158</i> , 18-23            |
| Pd <sub>7</sub> Ru <sub>1</sub><br>nanodendrites      | 1.0 M KOH +<br>1.0 M EG                                  | 67.7 % activity<br>after 500 cycles  | Nanoscale <b>2015</b> , <i>7</i> ,<br>12445-12451                |
| PdCu <sub>2</sub>                                     | 1.0 M KOH + 1<br>M ethanol                               | 70 % activity after<br>300 cycles    | ACS Appl. Mater.<br>Interfaces <b>2016</b> , <i>8</i> ,<br>34497 |
| PdNi                                                  | 1.0 M KOH + 1<br>M ethanol                               | 60 % activity after<br>500 cycles    | J. Colloid Interface Sci.<br><b>2017</b> , <i>493</i> , 190-197  |
| PtRu<br>Nanoparticles/XC                              | 0.5 M H <sub>2</sub> SO <sub>4</sub> +<br>0.5 M glycerol | 52 % activity after<br>500 cycles    | Electrochim. Acta <b>2014</b> ,<br><i>142</i> , 223-227          |
| PtPb <sub>0.27</sub> NPs/C                            | 0.1 M HClO <sub>4</sub> +<br>0.2 M ethanol               | 31.6 % activity<br>after 1000 cycles | Chem. Mater. <b>2016</b> , <i>28</i> ,<br>4447-4452.             |
| Pt <sub>0.3</sub> Ru <sub>0.6</sub> Pd <sub>0.1</sub> | 1 M KOH + 1                                              | 48 % activity after                  | New J. Chem. <b>2017</b> , <i>41</i> ,                           |



|              |                                            |                                      |                                                         |
|--------------|--------------------------------------------|--------------------------------------|---------------------------------------------------------|
|              | M methanol                                 | 500 cycles                           | 3048-3054                                               |
| PtAu/RGO/GC  | 1 M KOH + 1<br>M methanol                  | 69.8 % activity<br>after 1000 cycles | J. Mater. Chem. A <b>2013</b> ,<br><i>1</i> , 7255-7261 |
| THH PtNi NFs | 0.5 M HClO <sub>4</sub> +<br>0.2 M ethanol | 30 % activity after<br>300 cycles    | Nano Lett. <b>2016</b> , <i>16</i> ,<br>2762-2767       |

**Table S3** GOR performances of Pt<sub>3</sub>Co<sub>1</sub> UNWs-L and various electrocatalysts from published works.

| Catalysts                                        | Peaks currents<br>from CV curves |                                         | Electrolyte                                                   | References                                                |
|--------------------------------------------------|----------------------------------|-----------------------------------------|---------------------------------------------------------------|-----------------------------------------------------------|
|                                                  | J <sub>m</sub><br>(A/mg)         | J <sub>s</sub><br>(mA/cm <sup>2</sup> ) |                                                               |                                                           |
| Pt <sub>3</sub> Co <sub>1</sub> UNWs-L           | 3.7                              | 7.2                                     | 1.0 M KOH +<br>1.0 M Glycerol                                 | This work                                                 |
| PtNi <sub>0.67</sub> Pb <sub>0.26</sub><br>NWs/C | 0.36                             | 0.61                                    | 0.1 M HClO <sub>4</sub> +<br>0.2 M Glycerol                   | J. Mater. Chem. A<br><b>2017</b> , <b>5</b> , 18977-18983 |
| Pt Nanoparticles                                 |                                  | ~ 0.23                                  | 0.1 M H <sub>2</sub> SO <sub>4</sub> +<br>0.255 M<br>Glycerol | Electrochim. Acta <b>2013</b> ,<br>98, 25-31.             |
| Pt NOs                                           |                                  | ~ 0.35                                  | 0.1 M H <sub>2</sub> SO <sub>4</sub> +<br>0.1 M Glycerol      | Electrocatal. <b>2011</b> , <b>2</b> , 96-<br>105.        |
| Pt/MWCNT                                         |                                  | 0.16                                    | 0.1 M HClO <sub>4</sub> +<br>1.0 M Glycerol                   | Electrochim. Acta <b>2012</b> ,<br>66, 180-187.           |
| PtNi/C                                           | 0.204                            | 0.27                                    | 0.5 M KOH +<br>2.0 M Glycerol                                 | Appl. Catal. A <b>2012</b> ,<br>429-430, 39-47            |
| Pd-CN <sub>x</sub> /G                            | 1.1                              |                                         | 0.5 M KOH +<br>0.5 M Glycerol                                 | ACS Catal.<br><b>2015</b> , <b>5</b> , 3174-3180          |

|                                      |       |     |                               |                                                                 |
|--------------------------------------|-------|-----|-------------------------------|-----------------------------------------------------------------|
| Pd <sub>5</sub> Ru-PEDOT/C           |       | 4.3 | 1 M KOH + 0.5<br>M Glycerol   | Electrochim. Acta <b>2015</b> ,<br><i>180</i> , 339-352         |
| Pd <sub>50</sub> Ni <sub>50</sub> /C | 0.190 |     | 0.1 M KOH +<br>0.1 M Glycerol | Electrocatal. <b>2013</b> , 4,<br>167-178                       |
| Pd <sub>3</sub> Sn/phen-C            | 0.175 |     | 0.1 M KOH +<br>0.5 M Glycerol | Int. J. Hydrogen Energy<br><b>2016</b> , <i>41</i> , 1272-14280 |
| Pd-NiO <sub>x</sub> -P/C             | 0.364 |     | 0.1 M KOH +<br>0.5 M Glycerol | Chem. Eng. J. <b>2017</b> , 38,<br>419-427                      |
| PtAg nanotubes                       | 0.208 | 6.0 | 0.5 M KOH +<br>0.5 M Glycerol | Electrochem. Commun.<br><b>2014</b> , <i>46</i> ,36-39          |

**Table S4** The parameters of  $R_{ct}$  from equivalent circuits for different catalysts in different solutions

| Catalysts                              | 1 M KOH + 1 M EG ( $\Omega$<br>cm <sup>2</sup> ) | 1 M KOH + 1 M glycerol<br>( $\Omega$ cm <sup>2</sup> ) |
|----------------------------------------|--------------------------------------------------|--------------------------------------------------------|
| Pt <sub>3</sub> Co <sub>1</sub> UNWs-S | 108                                              | 189                                                    |
| Pt <sub>3</sub> Co <sub>1</sub> UNWs-M | 84                                               | 154                                                    |
| Pt <sub>3</sub> Co <sub>1</sub> UNWs-L | 76                                               | 131                                                    |
